# Supplementary material for: Structural selectivity of supported Pd nanoparticles: selective ethanol ammoxidation to acetonitrile
Source: Royal Society of Chemistry journal article supplement (doi:10.1039/d4ey00044g), 2024-01-01
Supplement: d4ey00044g1.pdf [file d4ey00044g1.pdf]

# Electronic Supporting Information (ESI)

## Structural Selectivity of Supported Pd Nanoparticles: Selective Ethanol Ammoxidation to Acetonitrile

Khaled Mohammed<sup>a</sup>, Reza Vakili<sup>b,c</sup>, Donato Decarolis<sup>d,e</sup>, Shaojun Xu<sup>d,f</sup>, Luke Keenan<sup>e</sup>, Apostolos Kordatos<sup>a</sup>, Nikolay Zhelev<sup>a</sup>, Chris K. Skylaris<sup>a</sup>, Marina Carravetta<sup>a</sup>, Emma K. Gibson<sup>d,g</sup>, Haresh Manyar<sup>b</sup>, Alexandre Goguet<sup>b</sup> and Peter P. Wells<sup>a,d,e,\*</sup>

---

<sup>a</sup> School of Chemistry, University of Southampton, University Road, Southampton, SO17 1BJ, UK.

<sup>b</sup> School of Chemistry and Chemical Engineering, Queen's University Belfast, David Keir Building, Stranmillis Rd, Belfast BT9 5AG, UK.

<sup>c</sup> Department of Chemical Engineering, Imperial College London, London SW7 2AZ, United Kingdom.

<sup>d</sup> UK Catalysis Hub, Research Complex at Harwell, Rutherford Appleton Laboratory, Harwell Oxon, Didcot, OX11 0FA, UK.

<sup>e</sup> Diamond Light Source, Harwell Science and Innovation Campus, Didcot OX11 0DE, Oxfordshire, United Kingdom.

<sup>f</sup> Department of Chemistry, the University of Manchester, Oxford Road, Manchester, M13 9PL, UK.

<sup>g</sup> School of Chemistry, University of Glasgow, Glasgow G12 8QQ, U.K.; UK Catalysis Hub, Research Complex at Harwell, Rutherford Appleton Lab, Harwell, Oxfordshire OX11 0FA, U.K.

Peter P Wells: [P.P.Wells@soton.ac.uk](mailto:P.P.Wells@soton.ac.uk)

# 1. XAS measurements

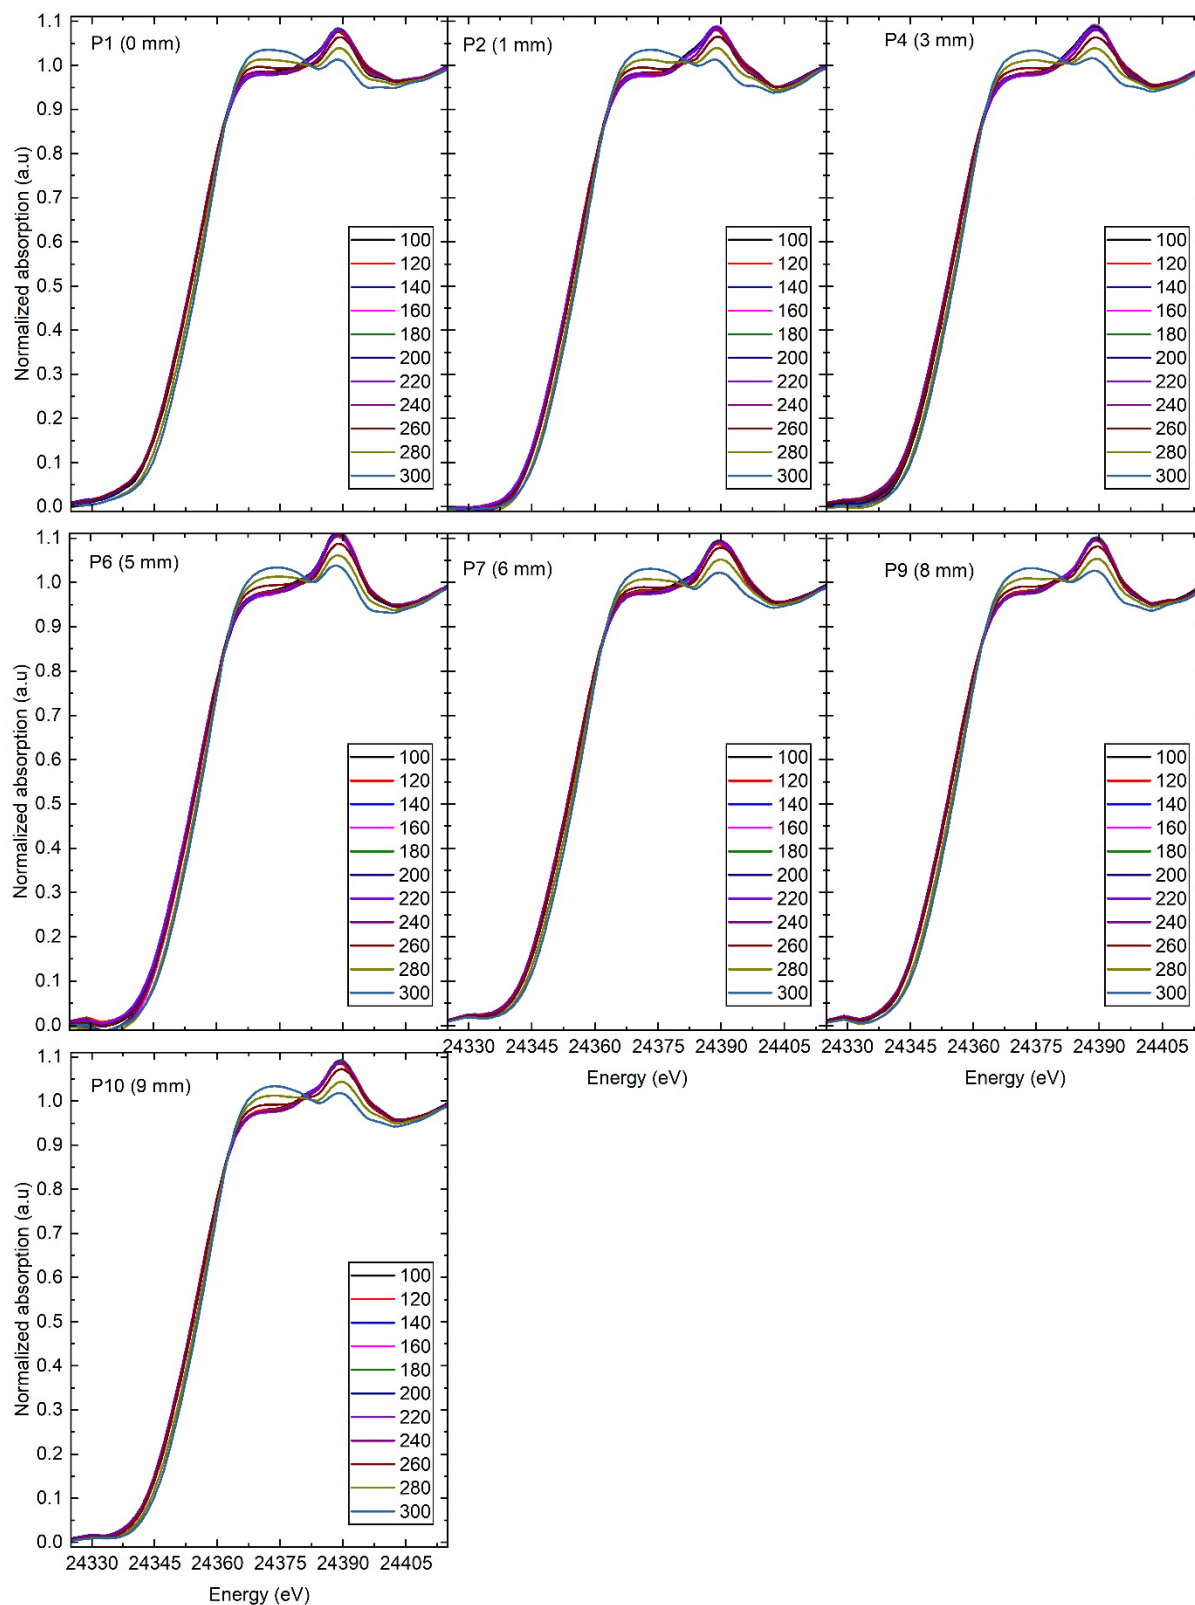

**Figure S1. Normalized XANES spectra at the Pd K-edge, captured at various positions along the catalyst bed during ethanol ammoxidation. Measurements were conducted isothermally across a temperature range of 100–300 °C, as indicated.**

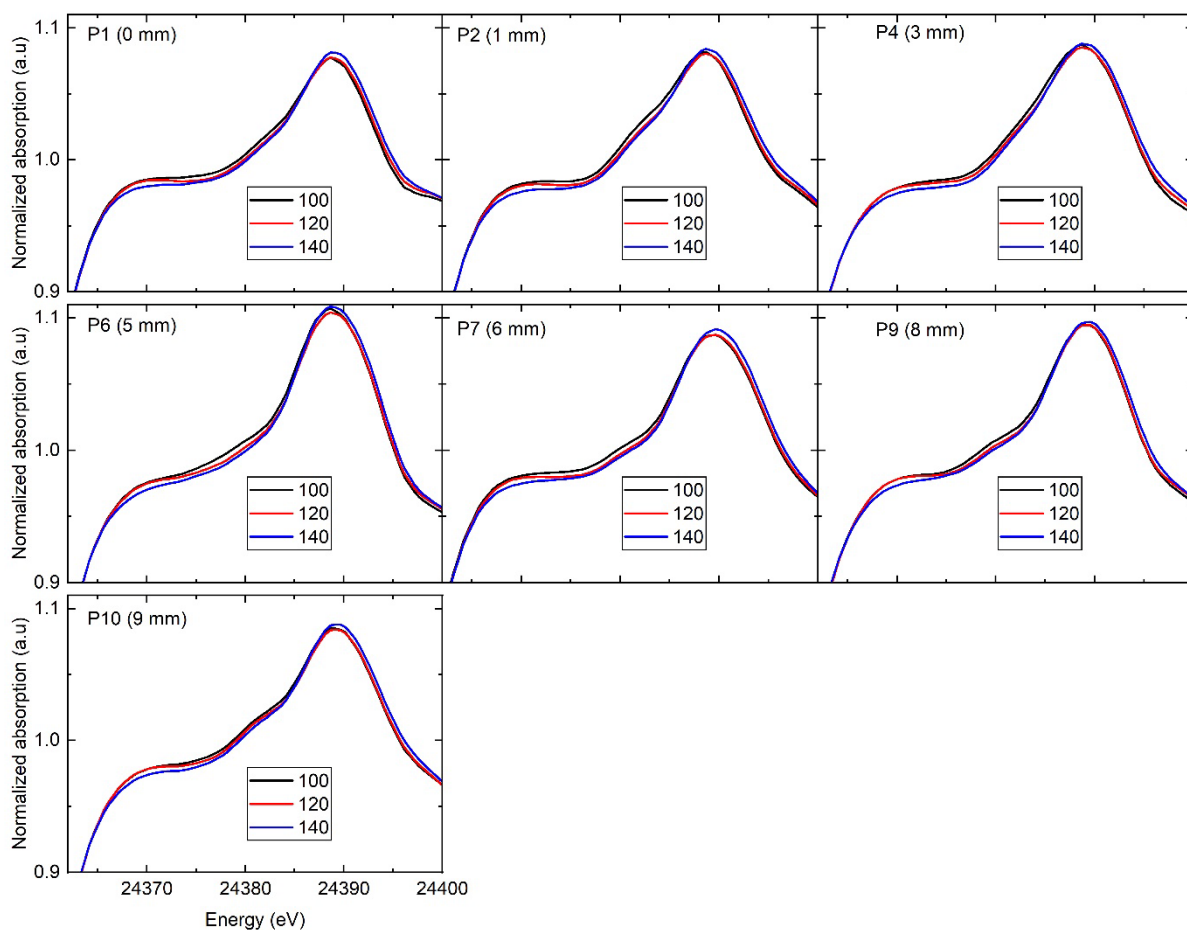

**Figure S2. Magnified view of the XANES spectra (100 – 140 °C) focusing on specific regions to detect potential signatures of PdN<sub>x</sub> PdC<sub>x</sub> phases that may emerge during the reaction.**

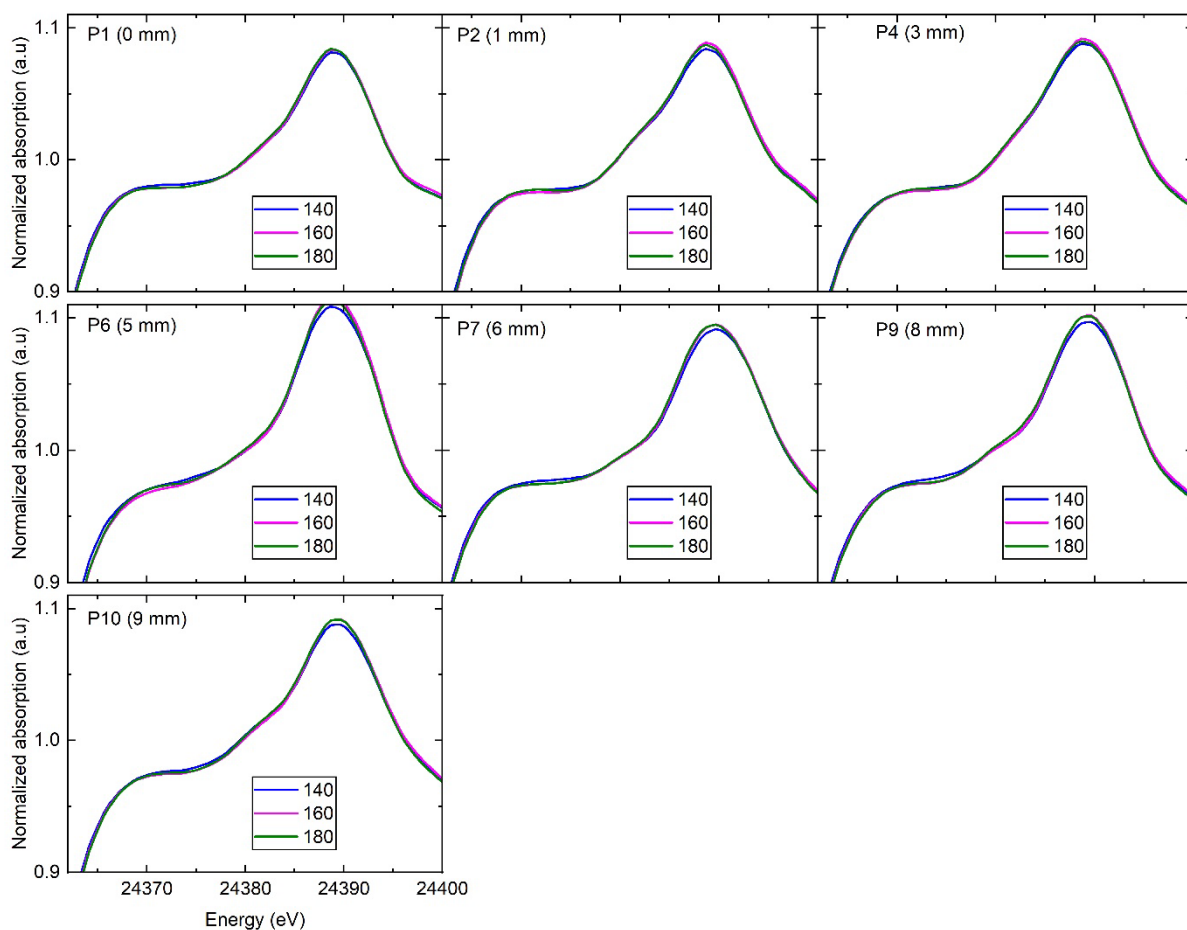

**Figure S3. Magnified view of the XANES spectra (140 – 180 °C) focusing on specific regions to detect potential signatures of PdN<sub>x</sub> PdC<sub>x</sub> phases that may emerge during the reaction.**

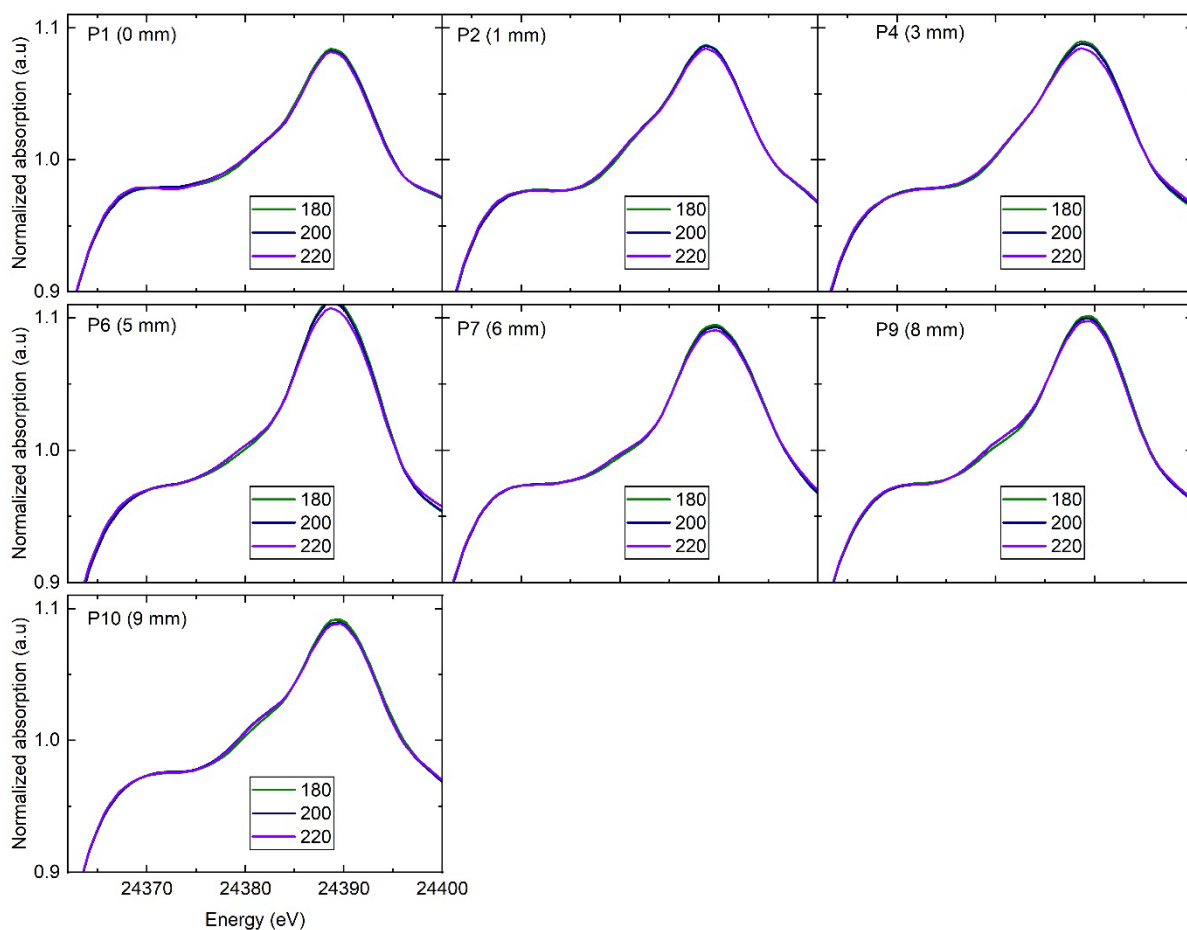

**Figure S4. Magnified view of the XANES spectra (180 – 220 °C) focusing on specific regions to detect potential signatures of PdN<sub>x</sub> PdC<sub>x</sub> phases that may emerge during the reaction.**

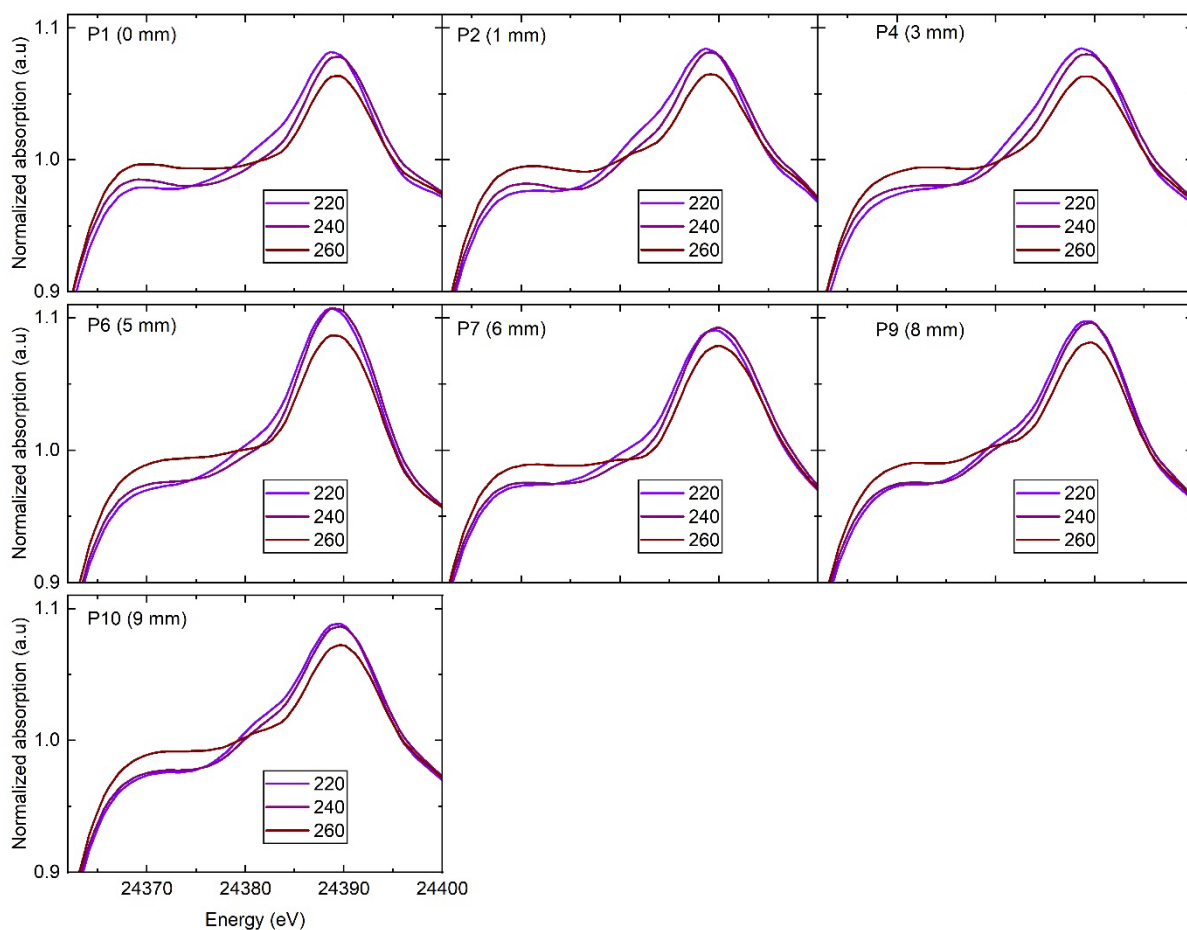

**Figure S5. Magnified view of the XANES spectra (220 – 260 °C) focusing on specific regions to detect potential signatures of PdN<sub>x</sub> PdC<sub>x</sub> phases that may emerge during the reaction.**

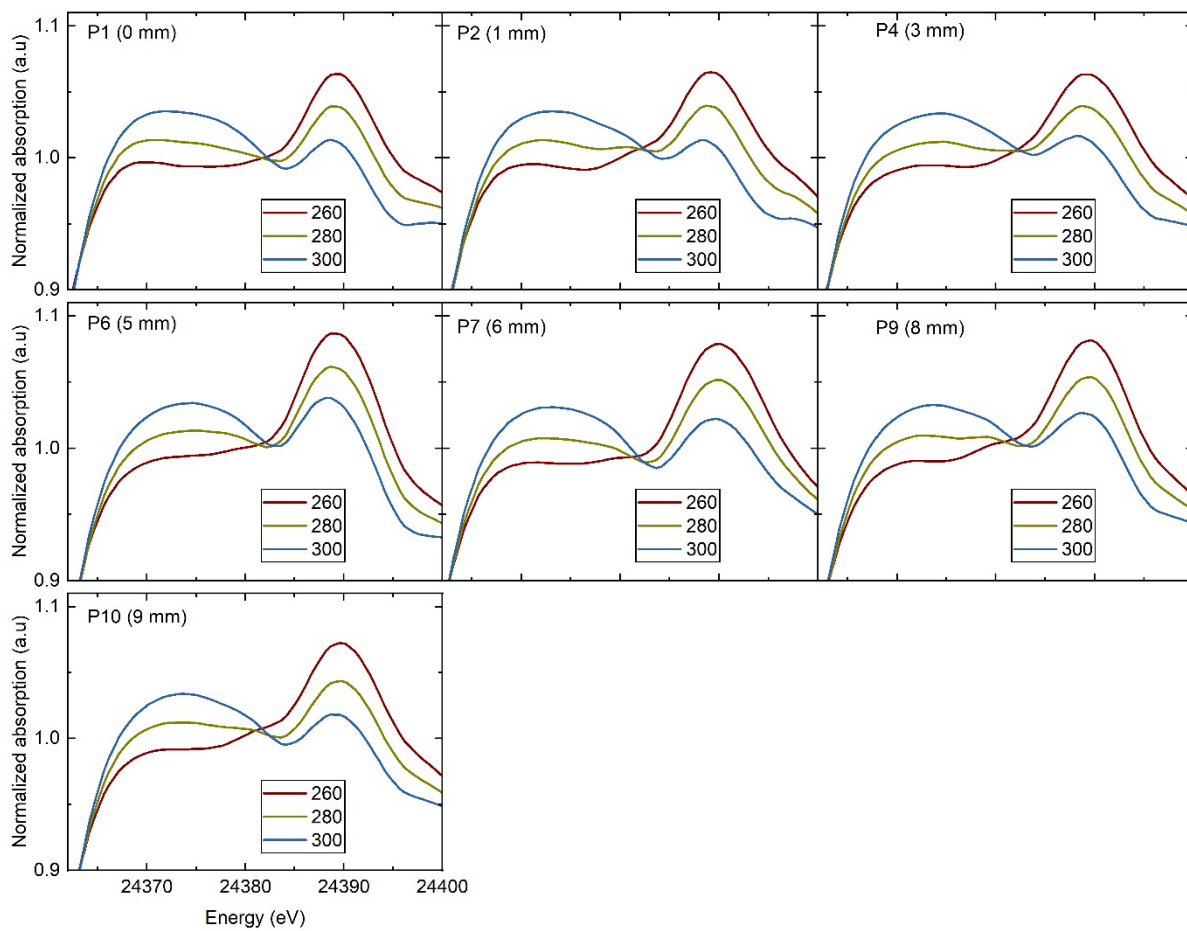

**Figure S6. Magnified view of the XANES spectra (260 – 300 °C) focusing on specific regions to detect potential signatures of PdN<sub>x</sub> PdC<sub>x</sub> phases that may emerge during the reaction.**

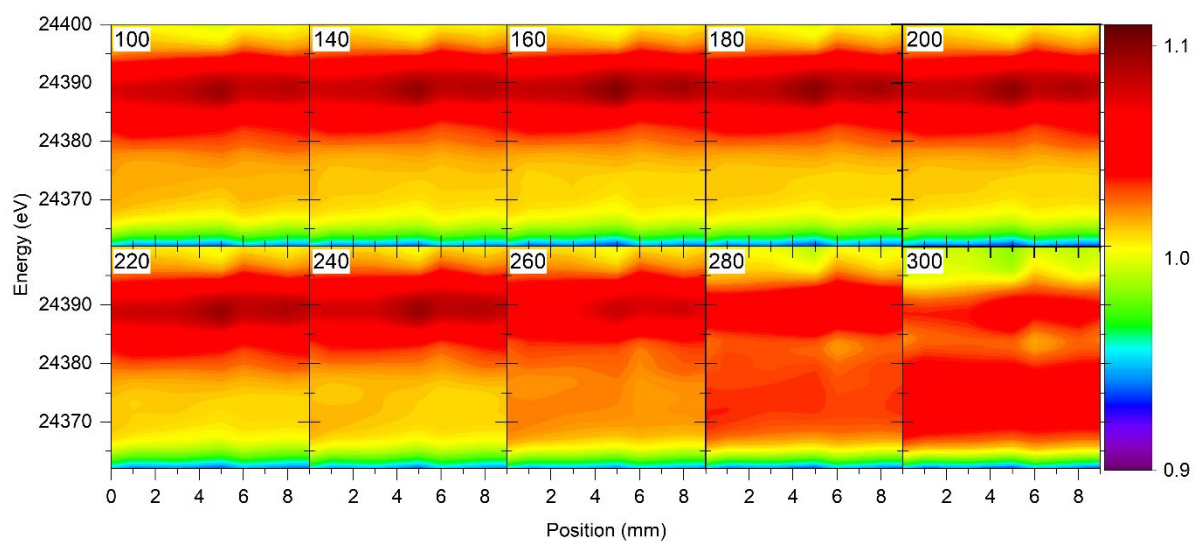

**Figure S7. 3D contour plots at various temperatures, as indicated, derived from the spectra showcased in Figures S2-S6, to trace any variations along the catalyst bed.**



## 2. *Ex situ* XAFS data

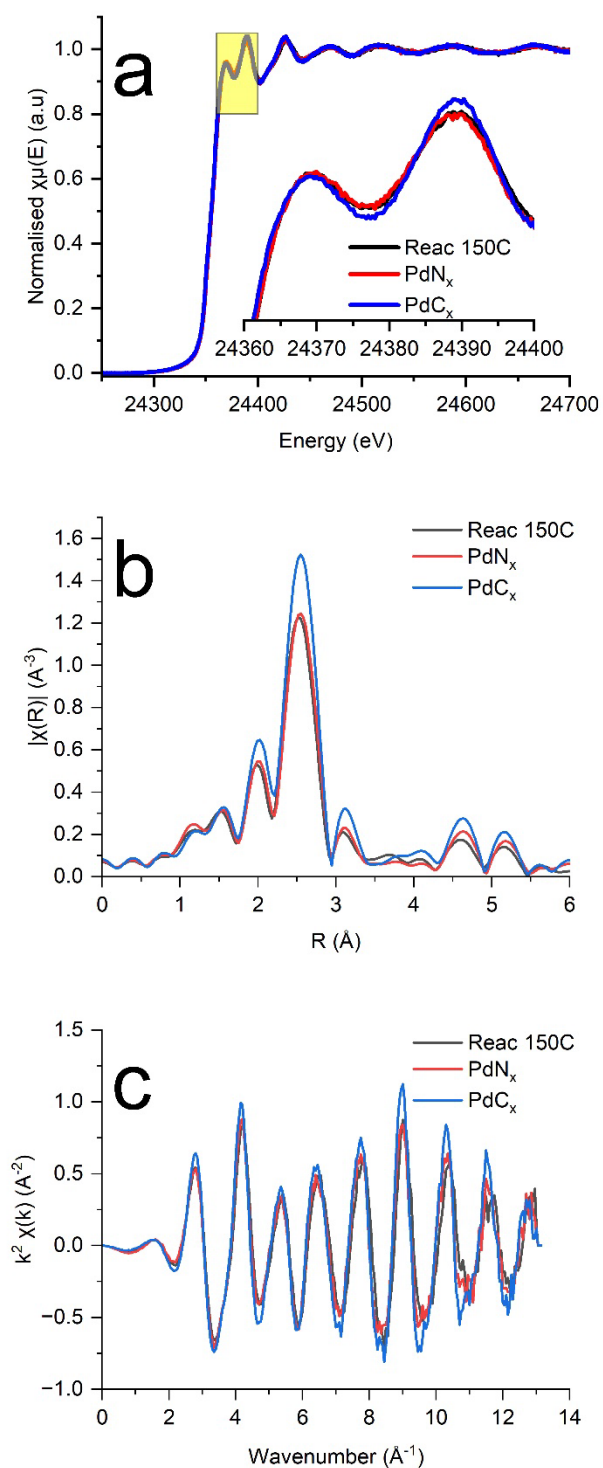

**Figure S8. Comparative analysis of Pd K-edge XAFS spectra: (a) Normalized spectra, (b) Corresponding Fourier transform, and (c)  $k^2$ -weighted  $\chi(k)$  data for PdN<sub>x</sub>, PdC<sub>x</sub>, and the catalyst post-use at 150°C.**

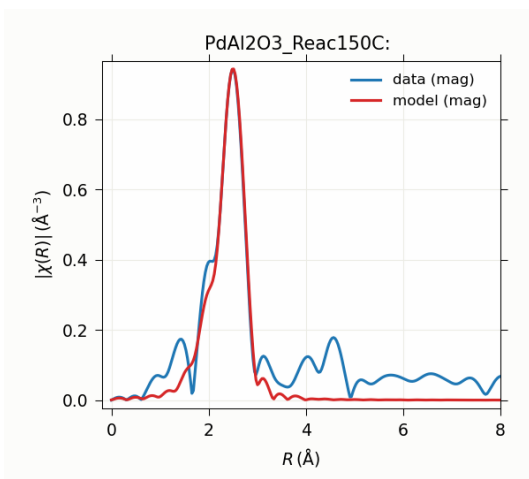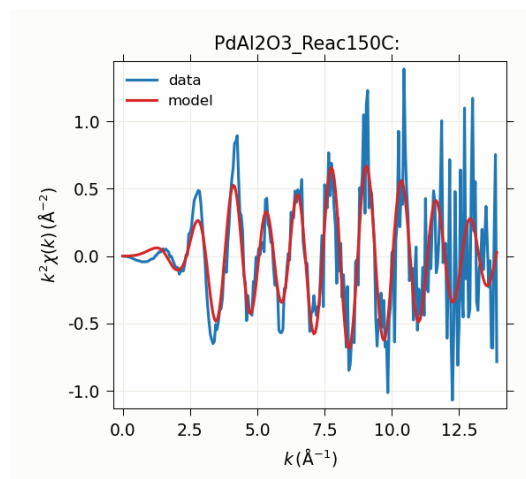

a) Used catalyst at 150C: r space (left),  $k^2$  weight (right)

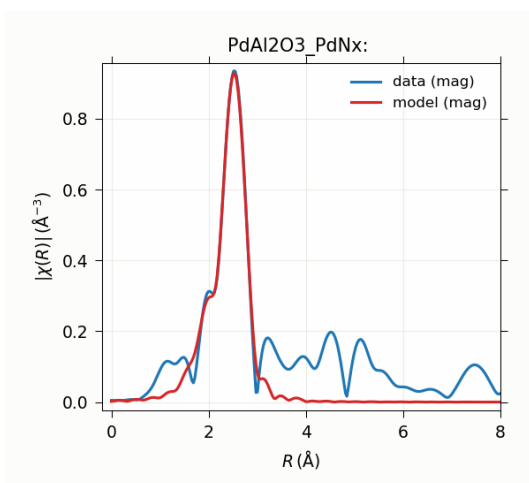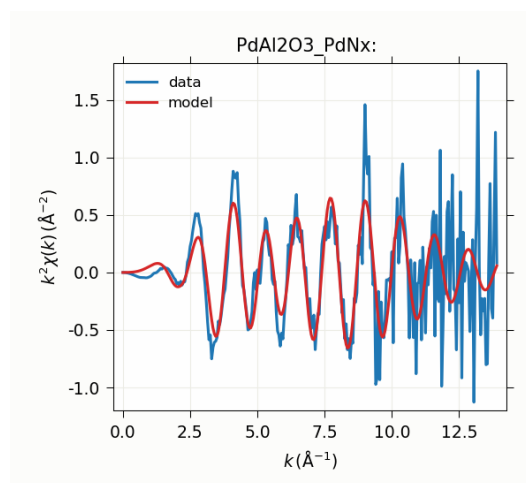

b) PdN<sub>x</sub>: r space (left),  $k^2$  weight (right)

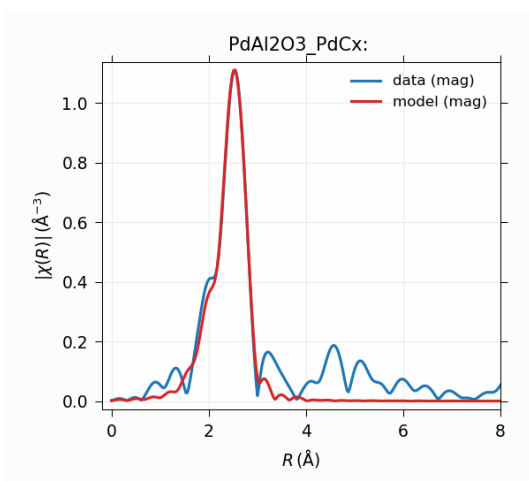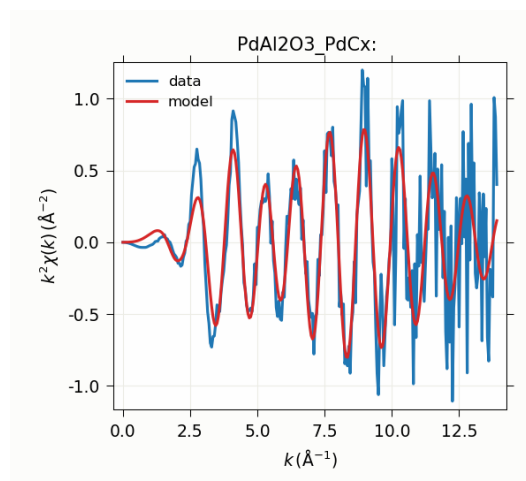

c) PdC<sub>x</sub>: r space (left),  $k^2$  weight (right)

**Figure S9. Ex-situ Pd K-edge EXAFS spectra and their corresponding fits (non-phase corrected) in Fourier-Transformed (left) and  $k^2$ -weighted (right) space of 1.5wt% Pd/ $\gamma$ -Al<sub>2</sub>O<sub>3</sub> samples: a) used at 150°C, b) PdN<sub>x</sub> phase, and c) PdC<sub>x</sub> phase.**

**Table S1. EXAFS fitting parameters for the Pd K-edge spectra of 1.5 wt% Pd/Al<sub>2</sub>O<sub>3</sub> catalyst used at 150°C, alongside the nitridised (PdN<sub>x</sub>) and carbidised (PdC<sub>x</sub>) samples.**

| Sample           | CN (Pd-Pd) | sigma <sup>2</sup> | E <sub>0</sub> (eV) | R (Å)     | R factor |
|------------------|------------|--------------------|---------------------|-----------|----------|
| used at 150C     | 6.2 (1.1)  | 0.0068 (16)        | -6.3(1.7)           | 2.778(10) | 0.034    |
| PdN <sub>x</sub> | 7.6(1.6)   | 0.0084 (15)        | -6.2(1.6)           | 2.789(10) | 0.121    |
| PdC <sub>x</sub> | 7.9(1.1)   | 0.0071(7)          | -5.9(0.8)           | 2.799(5)  | 0.009    |

\* Fitted from one scattering path of the absorbing Pd atom to the nearest neighbour Pd atoms (Pd-Pd), using  $S0^2 = 0.8$  as determined using a Pd foil standard; Fit range  $3 < k (\text{Å}^{-2}) < 11.9$ ,  $1 < R / \text{Å} < 3$ .

### 3. SEM Characterisation

(a)

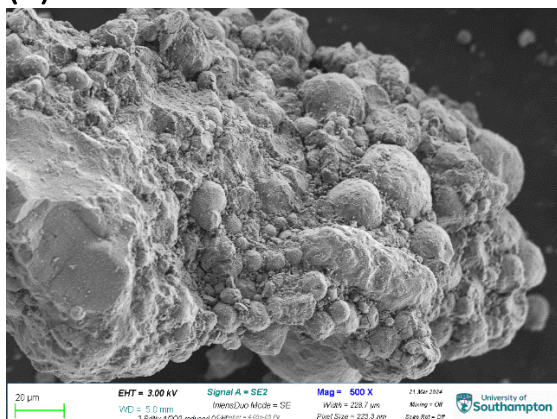

(b)

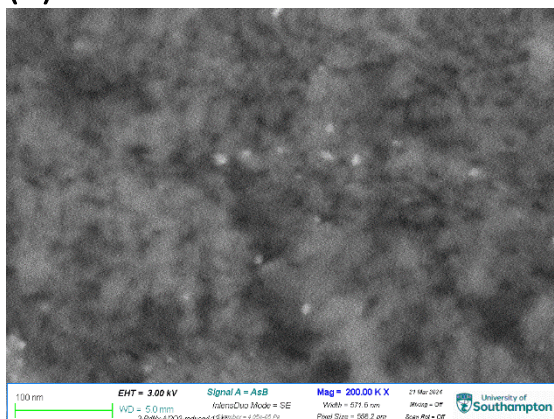

(c)

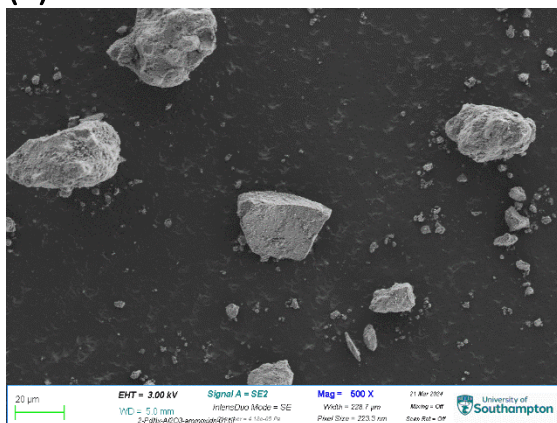

(d)

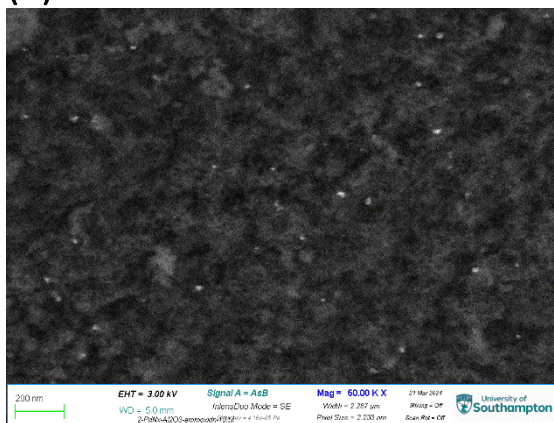

**Figure S10. SEM images of fresh (Figure S10a and b) and spent – i.e., post amoxidation - (Figure S10c and d) 1.5wt% Pd/γ-Al<sub>2</sub>O<sub>3</sub> catalyst.**

## 4. Ethanol pulse testing

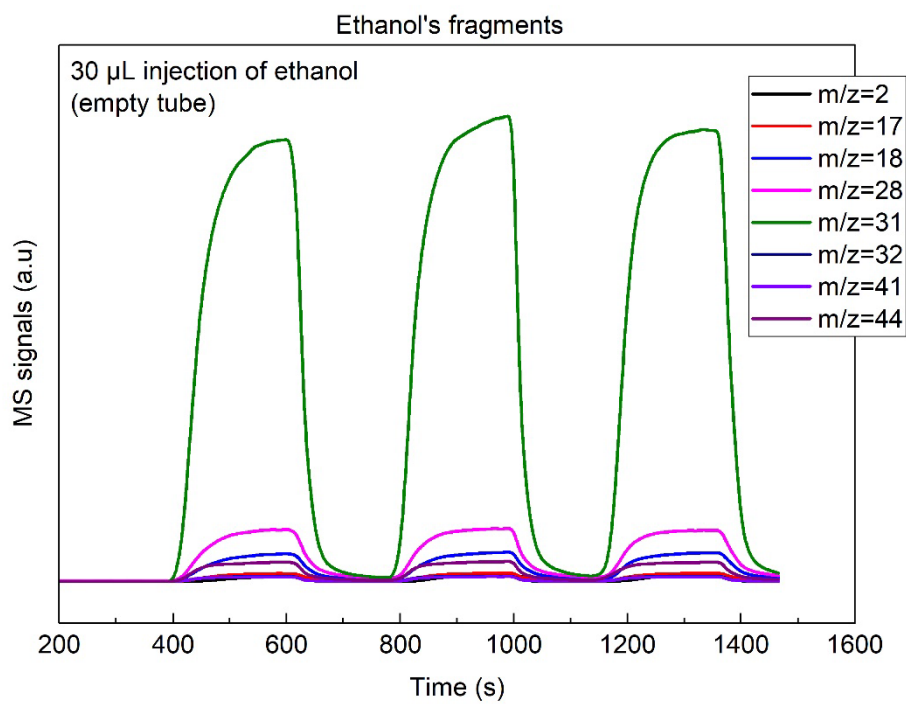

**Figure S11. 30  $\mu$ L injection of ethanol in an empty tube to trace any fragments of  $m/z = 2, 17, 18, 28, 31, 32, 41,$  and  $44$ . Injection was performed 3 times.**

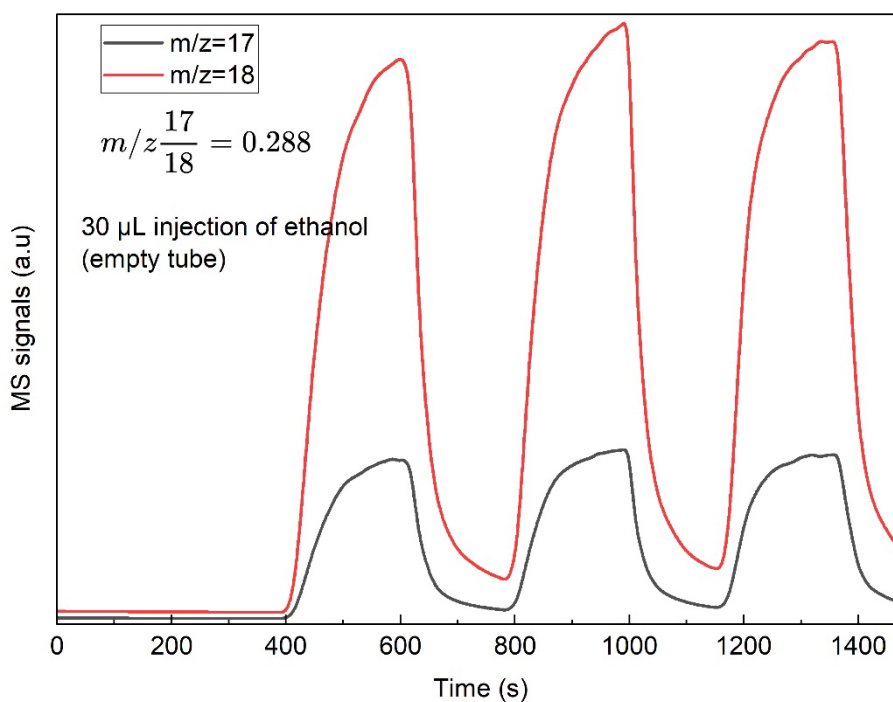

Figure S12. Same data presented in Figure S10 above but here we show only traces of  $m/z = 17$  and 18 when 30  $\mu$ L of ethanol was injected in an empty. Injection was performed 3 times with an average  $m/z(17/18)$  ratio of 0.288.

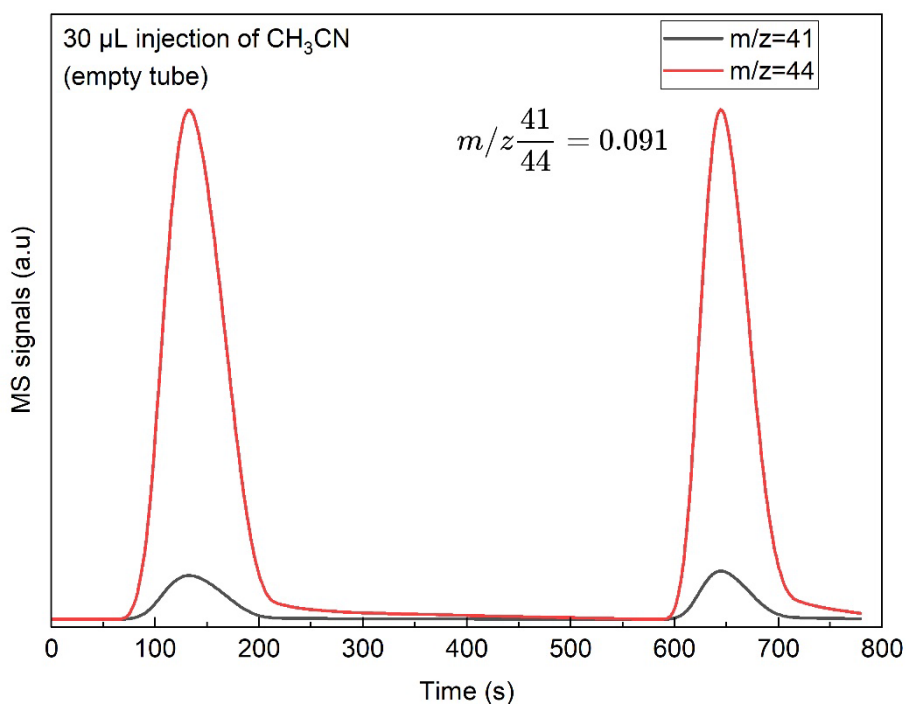

Figure S13. Traces of  $m/z = 41$  and 44 when 30  $\mu$ L of acetaldehyde was injected in an empty. Injection was performed 2 times with an average of  $m/z (41/44)$  ratio of 0.091.
